# Supplementary material for: Dysregulated miR-361-5p/VEGF Axis in the Plasma and Endothelial Progenitor Cells of Patients with Coronary Artery Disease
Source: PLoS One. 2014 May 27;9(5):e98070. doi: 10.1371/journal.pone.0098070 (PMC4035317; doi:10.1371/journal.pone.0098070)
Supplement: Table S1 — Quantitative PCR primer sequences. All primers used for determining the microRNAs or genes expression were listed in the table. (XLSX) [file pone.0098070.s003.xlsx]

## Sheet: 工作表1
	Supplementary Table S1: qPCR Primer Sequences
	miRNA Name		Sequence
	has-miR-361-5p	RT	gTCgTATCCAgTgCAgggTCCgAggTATTCgCACTggATACgACgTACCC
		Forward	CgCgCgTTATCAgAATCTCCA
		Reverse	gTgCAgggTCCgAggT
	has-miR-342-3p	RT	gTCgTATCCAgTgCAgggTCCgAggTATTCgCACTggATACgACACgggT
		Forward	ggggTCTCACACAgAAATCgC
		Reverse	gTgCAgggTCCgAggT
	hsa-miR-125b-5p	RT	gTCgTATCCAgTgCAgggTCCgAggTATTCgCACTggATACgACTCACAA
		Forward	ACCCTCCCTgAgACCCTAAC
		Reverse	gTgCAgggTCCgAggT
	hsa-miR-34a-5p	RT	gTCgTATCCAgTgCAgggTCCgAggTATTCgCACTggATACgACACAACC
		Forward	AgCCgTggCAgTgTCTTAgCT
		Reverse	gTgCAgggTCCgAggT
	has-miR-484	RT	gTCgTATCCAgTgCAgggTCCgAggTATTCgCACTggATACgACATCggg
		Forward	ATCTCAggCTCAgTCCCCT
		Reverse	gTgCAgggTCCgAggT
	has-miR-103a-3p	RT	gTCgTATCCAgTgCAgggTCCgAggTATTCgCACTggATACgACTCATAg
		Forward	gggAgCAgCATTgTACAggg
		Reverse	gTgCAgggTCCgAggT
	hsa-miR-140-5p	RT	gTCgTATCCAgTgCAgggTCCgAggTATTCgCACTggATACgACCTACCA
		Forward	ggTCgCAgTggTTTTACCC
		Reverse	gTgCAgggTCCgAggT
	hsa-miR-125a-5p	RT	gTCgTATCCAgTgCAgggTCCgAggTATTCgCACTggATACgACTCACAg
		Forward	CCCTCTCCCTgAgACCCTTTAAC
		Reverse	gTgCAgggTCCgAggT
	hsa-miR-16a-5p	RT	gTCgTATCCAgTgCAgggTCCgAggTATTCgCACTggATACgACCgCCAAT
		Forward	CgCgCTAgCAgCACgTAAAT
		Reverse	gTgCAgggTCCgAggT
	U6	RT	AAAATATgg
		Forward	CgCTTCggCAgCACATATAC
		Reverse	TTCACgAATTTgCgTgTCAT
	Gene Name	Forward			Reverse			Amplicon
	VEGFA	ACgAgggCCTggAgTgTgT			gCTggCCTTggTgAggTTT			81
	GAPDH	ggAgTCCACTggCgTCTTCA			TggTTCACACCCATgACgAA			123
