# Supplementary material for: Dysregulated miR-361-5p/VEGF Axis in the Plasma and Endothelial Progenitor Cells of Patients with Coronary Artery Disease
Source: PLoS One. 2014 May 27;9(5):e98070. doi: 10.1371/journal.pone.0098070 (PMC4035317; doi:10.1371/journal.pone.0098070)
Supplement: Table S2 — Baseline characteristics of 55 studied subjects in healthy and CAD patients. The criteria and clinical diagnosis for recruting subjects from either healthy or CAD patients were listed in the table. The value indicated the mean with standard deviation or number with percentage. (XLSX) [file pone.0098070.s004.xlsx]

## Sheet: 工作表1
	Supplementary Table 2 Baseline characteristic of 55 studied subjects in healthy and CAD patients
					Healthy (N=15)		CAD (N=50)		p Values
	Age (years)				63.3 (3.2)		64.2 (7.2)		0.217
	Gender								0.231
	Male				7 (47%)		28 (56%)
	Female				8 (53%)		22 (44%)
	Body Mass Index (kg/m²)				23.3 (7.2)		27.2 (5.4)		0.398
	Smoking				3 (20%)		15 (30%)		0.533
	Hypertention				4 (26.7%)		31 (62%)		0. 043
	Hyperlipidemia				4 (26%)		24 (48%)		0.283
	Diabetes Mellitus (DM)				3 (20%)		11 (22.2%)		0.826
	Lipid Profile (mg/dl)
	Total Cholesterol				161.5 (3.5)		169.3 (22.3)		0.689
	Triglyceride				90.43 (4.2)		98.8 (13.2)		0.392
	High Density Lipoprotein (HDL)				49.9 (11.3)		40.3 (9.2)		0.063
	Low Density Lipoprotein (LDL)				91.32 (16.4)		120.3 (23.2)		0.211
	Creatinine (mg/dl)				0.72 (0.12)		1.14 (0.23)		< 0.001
	Uric Acid				5.33 (2.13)		6.94 (3.91)		0.041
	Estimated Glomerular Filtration Rate				80.1 (9.8)		54.2 (10.1)		0.019
	Medication Use
	Angiotensin-converting enzyme inhibitors				3 (20%)		12 (24%)		0.332
	Angiotensin II receptor blockers				1 (6%)		9 (18%)		0.054
	Calcium channel blockers				3 (20%)		29 (58%)		0.043
	Diuretics				3 (20%)		9 (18%)		0.401
	Statin				2 (13.3%)		32 (64%)		0.014
	CAD, Coronary artery disease.
	Values are mean (SD) or number (%)
												-1
